# Supplementary material
Source: ML conference proceedings conference paper supplement (https://openreview.net/forum?id=__ObYt4753c)
Supplement: supplementary_material [file attachment]

## Sheet: backbone
CUB, 1-shot
	Conv4	Conv6	Resnet 10	Resnet 18	Resnet 34			Conv4	Conv6	Resnet 10	Resnet 18	Resnet 34
Baseline	47.12% +- 0.74%	55.77% +- 0.86%	63.34% +- 0.91%	65.51% +- 0.87%	67.96% +- 0.89%		Baseline	0.4712	0.5577	0.6334	0.6551	0.6796
Baseline++	60.53% +- 0.83%	66.00% +- 0.89%	69.55% +- 0.89%	67.02% +- 0.90%	68.00% +- 0.83%		Baseline++	0.6053	0.66	0.6955	0.6702	0.68
Matchingnet~\cite{vinyals2016matching}	61.16% +- 0.89%	67.16% +- 0.97%	71.29% +- 0.90%	72.36% +- 0.90%	71.44% +- 0.96%		Matchingnet	0.6116	0.6716	0.7129	0.7236	0.7144
Protonet~\cite{snell2017prototypical}	51.31% +- 0.91%	66.07% +- 0.97%	70.13% +- 0.94%	71.88% +- 0.91%	72.03% +- 0.91%		Protonet	0.5131	0.6607	0.7013	0.7188	0.7203
MAML~\cite{finn2017model}	55.92% +- 0.95%	65.91% +- 0.97%	71.29% +- 0.95%	69.96% +- 1.01%	67.28% +- 1.08%		MAML	0.5592	0.6591	0.7129	0.6996	0.6728
Relationnet~\cite{sung2018learning}	62.45% +- 0.98%	63.11% +- 0.94%	68.65% +- 0.91%	67.59% +- 1.02%	66.20% +- 0.99%		Relationnet	0.6245	0.6311	0.6865	0.6759	0.662
CUB, 5-shot
	Conv4	Conv6	Resnet 10	Resnet 18	Resnet 34			Conv4	Conv6	Resnet 10	Resnet 18	Resnet 34
Baseline	64.16% +- 0.71%	73.07% +- 0.71%	81.27% +- 0.57%	82.85% +- 0.55%	84.27% +- 0.53%		Baseline	0.6416	0.7307	0.8127	0.8285	0.8427
Baseline++	79.34% +- 0.61%	82.02% +- 0.55%	85.17% +- 0.50%	83.58% +- 0.54%	84.50% +- 0.51%		Baseline++	0.7934	0.8202	0.8517	0.8358	0.845
Matchingnet~\cite{vinyals2016matching}	72.86% +- 0.70%	77.08% +- 0.66%	83.59% +- 0.58%	83.64% +- 0.60%	83.78% +- 0.56%		Matchingnet	0.7286	0.7708	0.8359	0.8364	0.8378
Protonet~\cite{snell2017prototypical}	70.77% +- 0.69%	78.14% +- 0.67%	84.76% +- 0.52%	87.42% +- 0.48%	85.98% +- 0.53%		Protonet	0.7077	0.7814	0.8476	0.8742	0.8598
MAML~\cite{finn2017model}	72.09% +- 0.76%	76.31% +- 0.74%	80.33% +- 0.70%	82.70% +- 0.65%	83.47% +- 0.59%		MAML	0.7209	0.7631	0.8033	0.827	0.8347
Relationnet~\cite{sung2018learning}	76.11% +- 0.69%	77.81% +- 0.66%	81.12% +- 0.63%	82.75% +- 0.58%	82.30% +- 0.58%		Relationnet	0.7611	0.7781	0.8112	0.8275	0.823
mini-imagnet, 1-shot
	Conv4	Conv6	Resnet 10	Resnet 18	Resnet 34			Conv4	Conv6	Resnet 10	Resnet 18	Resnet 34
Baseline	42.11% +- 0.71%	45.82% +- 0.74%	52.37% +- 0.79%	51.75% +- 0.80%	49.82% +- 0.73%		Baseline	0.4211	0.4582	0.5237	0.5175	0.4982
Baseline++	48.24% +- 0.75%	48.29% +- 0.72%	53.97% +- 0.79%	51.87% +- 0.77%	52.65% +- 0.83%		Baseline++	0.4824	0.4829	0.5397	0.5187	0.5265
Matchingnet~\cite{vinyals2016matching}	48.14% +- 0.78%	50.47% +- 0.86%	54.49% +- 0.81%	52.91% +- 0.88%	53.20% +- 0.78%		Matchingnet	0.4814	0.5047	0.5449	0.5291	0.532
Protonet~\cite{snell2017prototypical}	44.42% +- 0.84%	50.37% +- 0.83%	51.98% +- 0.84%	54.16% +- 0.82%	53.90% +- 0.83%		Protonet	0.4442	0.5037	0.5198	0.5416	0.539
MAML~\cite{finn2017model}	46.47% +- 0.82%	50.96% +- 0.92%	54.69% +- 0.89%	49.61% +- 0.92%	51.46% +- 0.90%		MAML	0.4647	0.5096	0.5469	0.4961	0.5146
Relationnet~\cite{sung2018learning}	49.31% +- 0.85%	51.84% +- 0.88%	52.19% +- 0.83%	52.48% +- 0.86%	51.74% +- 0.83%		Relationnet	0.4931	0.5184	0.5219	0.5248	0.5174
mini-imagnet, 5-shot
	Conv4	Conv6	Resnet 10	Resnet 18	Resnet 34			Conv4	Conv6	Resnet 10	Resnet 18	Resnet 34
Baseline	62.53% +- 0.69%	66.42% +- 0.67%	74.69% +- 0.64%	74.27% +- 0.63%	73.45% +- 0.65%		Baseline	0.6253	0.6642	0.7469	0.7427	0.7345
Baseline++	66.43% +- 0.63%	68.09% +- 0.69%	75.90% +- 0.61%	75.68% +- 0.63%	76.16% +- 0.63%		Baseline++	0.6643	0.6809	0.759	0.7568	0.7616
Matchingnet~\cite{vinyals2016matching}	63.48% +- 0.66%	63.19% +- 0.70%	68.82% +- 0.65%	68.88% +- 0.69%	68.32% +- 0.66%		Matchingnet	0.6348	0.6319	0.6882	0.6888	0.6832
Protonet~\cite{snell2017prototypical}	64.24% +- 0.72%	67.33% +- 0.67%	72.64% +- 0.64%	73.68% +- 0.65%	74.65% +- 0.64%		Protonet	0.6424	0.6733	0.7264	0.7368	0.7465
MAML~\cite{finn2017model}	62.71% +- 0.71%	66.09% +- 0.71%	66.62% +- 0.83%	65.72% +- 0.77%	65.90% +- 0.79%		MAML	0.6271	0.6609	0.6662	0.6572	0.659
Relationnet~\cite{sung2018learning}	66.60% +- 0.69%	64.55% +- 0.70%	70.20% +- 0.66%	69.83% +- 0.68%	69.61% +- 0.67%		Relationnet	0.666	0.6455	0.702	0.6983	0.6961

## Sheet: domain_distance
ResNet18, 5-shot
	CUB	miniImageNet	CUB->miniImageNet
Baseline	0.8285	0.7427	0.6557
Baseline++	0.8358	0.7568	0.6204
MatchingNet	0.8275	0.6888	0.5307
ProtoNet	0.8742	0.7368	0.6202
MAML	0.827	0.6572	0.5134
RelationNet	0.8364	0.6983	0.5771

## Sheet: domain_adaptation
ResNet18, 5-shot
	CUB		mini-ImageNet		mini-ImageNet-> CUB
Method	Yes	No	Yes	No	Yes	No
RelationNet	83.17	82.75	70.49	69.83	58.54	57.71
MAML	84.01	82.7	70.67	65.72	56.03	51.34
ProtoNet	87.15	87.42	72.27	73.68	62.68	62.02
MatchingNet	84.39	82.75	72.92	68.88	57.99	53.07
Baseline++	83.58		75.68		62.04
Baseline	82.85		74.27		65.57
